# Supplementary material
Source: publisher figshare collection journal article supplement (https://frontiersin.figshare.com/ndownloader/files/26772332)
Supplement: Supplementary file 1 [file 26772332]

**Table S2:** Model output exploring the association between current levels of human development (in 2014) and territorial abandonment between 1994 and 2014(Human + Human 2 is exploring of a quadartic relationship). In addition, averaged parameter estimates exploring for association between current levels of human development (in 2014) and territorial abandonment between 1994 and 2014.

| Radius | Terms (K) | df | ∆AICc | Weight |  | Variable Estimate | Lower 95% CI | Upper 95% CI | Variable importance |
| --- | --- | --- | --- | --- | --- | --- | --- | --- | --- |
| 100 | Null | 1 | 0.00 | 0.398 |  |  |  |  |  |
|  | Human | 2 | 0.06 | 0.387 |  | -0.013 | -0.033 | 0.006 | 0.49 |
|  | Human + Human 2 | 3 | 2.40 | 0.120 |  |  |  |  |  |
|  | Location | 5 | 3.43 | 0.072 |  |  |  |  |  |
| 500 | Null | 1 | 0.00 | 0.399 |  |  |  |  |  |
|  | Human | 2 | 0.25 | 0.352 |  | -0.005 | -0.006 | 0.054 | 0.56 |
|  | Human + Human 2 | 3 | 1.87 | 0.156 |  | -0.000 | -0.001 | 0.001 | 0.17 |
|  | Location | 5 | 3.43 | 0.072 |  |  |  |  |  |
| 1000 | Human | 2 | 0.00 | 0.362 |  | 0.005 | -0.082 | 0.092 | 0.69 |
|  | Null | 1 | 0.48 | 0.285 |  |  |  |  |  |
|  | Human + Human 2 | 3 | 0.48 | 0.284 |  | -0.001 | -0.002 | 0.000 | 0.31 |
|  | Location | 5 | 3.91 | 0.051 |  |  |  |  |  |
|  |  |  |  |  |  |  |  |  |  |
| 2500 | Human + Human 2 | 3 | 0.00 | 0.351 |  | -0.001 | -0.003 | 0.000 | 0.38 |
|  | Null | 1 | 0.31 | 0.300 |  |  |  |  |  |
|  | Human | 2 | 0.48 | 0.276 |  | 0.031 | -0.105 | 0.166 | 0.68 |
|  | Loc | 5 | 3.75 | 0.054 |  |  |  |  |  |
| 5000 | Null | 1 | 0.00 | 0.582 |  |  |  |  |  |
|  | Human | 2 | 2.23 | 0.191 |  |  |  |  |  |
|  | Loc | 5 | 3.43 | 0.105 |  |  |  |  |  |
|  | Human + Human 2 | 3 | 3.85 | 0085 |  |  |  |  |  |
